# Supplementary material
Source: Research Square preprint supplement (doi:10.21203/rs.3.rs-9133307/v1)
Supplement: Supplementary file 1 [file 66c2515ca1062c2be8957700.docx]

**Supplementary Table S1: Leave-one-out sensitivity analysis**

|  | **Pooled Estimate**  **(%)** | **95% CI** | **I² (%)** |
| --- | --- | --- | --- |
| Functional Outcomes |  |  |  |
| Constant Murley |  |  |  |
| None (Original) | -12.14 | -30.32 to 6.05 | 99 |
| Bahrs et al., 2010 | -11.10 | -37.22 to 15.02 | 99 |
| Fraser et al., 2024 | -17.13 | -36.90 to 2.63 | 99 |
| Güven et al., 2024 | -1.96 | -12.43 to 8.51 | 95 |
| Klute et al 2025 | -13.23 | -34.92 to 8.46 | 99 |
| Ockert et al., 2013 | -14.79 | -35.33 to 5.75 | 99 |
| Zhang et al., 2024 | -14.77 | -37.42 to 7.88 | 99 |
| ULCA |  |  |  |
| None (Original) | -1.86 | -7.45 to 3.73 | 98 |
| Bahrs et al., 2010 | 1.00 | -0.25 to 2.25 | - |
| Zhang et al., 2024 | -4.70 | -5.75 to -3.65 | - |
| DASH |  |  |  |
| None (Original) | -25.87 | -70.85 to 19.10 | 100 |
| Bahrs et al., 2015 | -37.63 | -110.31 to 35.06 | 100 |
| Egol et al., 2022 | -34.96 | -104.36 to 34.45 | 100 |
| Güven et al., 2024 | 6.28 | 1.20 to 11.37 | 66 |
| Klute et al 2025 | -37.21 | -98.10 to 23.69 | 24.8 |
| Oxford Shoulder Score |  |  |  |
| None (Original) | 5.00 | 1.31 to 8.69 | - |
| Fraser et al., 2024 | - | - | - |
| Reoperation rate (%) |  |  |  |
| None (Original) | 0.27 | 0.10 to 0.70 | 98 |
| Bahrs et al., 2010 | 0.34 | 0.13 to 0.87 | 98 |
| Bahrs et al., 2015 | 0.25 | 0.08 to 0.75 | 98 |
| Birsel et al., 2025 | 0.29 | 0.11 to 0.78 | 98 |
| Egol et al., 2022 | 0.28 | 0.10 to 0.77 | 98 |
| Fraser et al., 2024 | 0.24 | 0.08 to 0.67 | 98 |
| Frima et al 2019 | 0.23 | 0.07 to 0.71 | 98 |
| Klute et al 2025 | 0.29 | 0.11 to 0.75 | 98 |
| Ockert et al., 2013 | 0.28 | 0.10 to 0.78 | 98 |
| Robinson et al., 2019 | 0.21 | 0.10 to 0.45 | 95 |
| Zhang et al., 2024 | 0.32 | 0.12 to 0.84 | 98 |
| Complications |  |  |  |
| Secondary fracture displacement |  |  |  |
| None (Original) | 0.06 | 0.00 to 3.14 | 93 |
| Bahrs et al., 2010 | 0.01 | 0.00 to 0.09 | - |
| Bahrs et al., 2015 | 0.27 | 0.18 to 0.39 | - |
| Humeral head necrosis |  |  |  |
| None (Original) | 0.04 | 0.00 to 2.99 | 97 |
| Bahrs et al., 2010 | 0.02 | 0.00 to 0.26 | 83 |
| Klute et al 2025 | 0.15 | 0.02 to 1.32 | 90 |
| Ockert et al., 2013 | 0.04 | 0.00 to 201.82 | 99 |
| AVN |  |  |  |
| None (Original) | 0.12 | 0.05 to 0.26 | 88 |
| Birsel et al., 2025 | 0.11 | 0.04 to 0.29 | 91 |
| Egol et al., 2022 | 0.12 | 0.05 to 0.32 | 91 |
| Frima et al 2019 | 0.12 | 0.04 to 0.32 | 91 |
| Robinson et al., 2019 | 0.15 | 0.09 to 0.27 | 68 |
| Zhang et al., 2024 | 0.09 | 0.05 to 0.16 | 67 |
| Infection |  |  |  |
| None (Original) | 0.02 | 0.01 to 0.08 | 64 |
| Bahrs et al., 2015 | 0.02 | 0.00 to 0.08 | 63 |
| Egol et al., 2022 | 0.02 | 0.00 to 0.11 | 75 |
| Klute et al 2025 | 0.04 | 0.02 to 0.08 | 0 |
| Zhang et al., 2024 | 0.03 | 0.01 to 0.11 | 75 |
| Non-union |  |  |  |
| None (Original) | 0.02 | 0.00 to 0.14 | 85 |
| Egol et al., 2022 | 0.02 | 0.00 to 0.61 | 92 |
| Klute et al 2025 | 0.06 | 0.02 to 0.13 | 47 |
| Robinson et al., 2019 | 0.01 | 0.00 to 0.09 | 66 |
| Screw penetration |  |  |  |
| None (Original) | 0.16 | 0.11 to 0.21 | 0 |
| Bahrs et al., 2015 | 0.16 | 0.11 to 0.23 | 0 |
| Birsel et al., 2025 | 0.16 | 0.11 to 0.22 | 0 |
| Egol et al., 2022 | 0.15 | 0.10 to 0.22 | 0 |
| Zhang et al., 2024 | 0.16 | 0.11 to 0.22 | 0 |

**Supplementary Table S2: Risk of Bias**

**Robins 1 Tool for Non-Randomised Studies**

| **S.NO** | **AUTHOR YEAR** | **TITLE** | **6.1 Was the result reported in accordance with an available, pre-determined analysis plan?** | **6.2 Was the numerical result being assessed likely to have been selected, on the basis of the results, from multiple outcome measurements within the outcome domain?** | **6.3 Was the numerical result being assessed likely to have been selected, on the basis of the results, from multiple analyses of the data?** | **6.4 Was the numerical result being assessed likely to have been selected, on the basis of the results, from multiple subgroups?** | **Judgment** | **Overall Appraisal** | **Comments** |
| --- | --- | --- | --- | --- | --- | --- | --- | --- | --- |
| 1 | Bahrs et al., 2010 [21] | Long-term results after non-plate head-preserving fixation of proximal humeral fractures | Unclear | Unclear | Unclear | Unclear | Moderate | Exclude | No protocol/registration reported; multiple analyses presented without prespecification |
| 2 | Güven et al., 2024 [19] | Mid- to long-term outcomes of proximal humerus fractures treated with open reduction, plate fixation, and iliac bone autograft augmentation | Unclear | Unclear | Unclear | Unclear | Moderate | Exclude | No registered protocol; multiple measurements summarized without pre-specification. |
| 3 | Neer CS, 2010 [23] | Displaced Proximal Humeral Fractures: PART II. TREATMENT OF THREE-PART AND FOUR-PART DISPLACEMENT | Unclear | YES | Unclear | Unclear | Moderate | Exclude | Historical case series with extensive subgrouping; no prespecified analysis plan; likely selective emphasis among many measurements |
| 4 | Bahrs et al., 2015 [20] | Which parameters affect medium- to long-term results after angular stable plate fixation for proximal humeral fractures? | Unclear | Unclear | Unclear | Unclear | Moderate | Exclude | No protocol/registration cited. |
| 5 | Birsel et al., 2025 [24] | Proximal Humerus Fractures Treated with Proximal Humerus Inter Locking System (PHILOS): Minimum 10-Year Clinical and Radiological Outcomes | Unclear | Unclear | Unclear | Unclear | Moderate | Exclude | No registered analysis plan reported in pre‑proof text |
| 6 | Frima et al., 2019 [25] | Long-term follow-up after MIPO Philos plating for proximal humerus fractures | partial | Unclear | Unclear | Unclear | Moderate | Exclude | No publicly available protocol/SAP; several analytic choices (e.g., bivariate tests by AO type, age, mechanism) → selective emphasis can’t be excluded. |
| 7 | Klute et al., 2025 [26] | Plate osteosynthesis versus non‑surgical treatment in displaced proximal humerus fractures—long term functional outcome and quality of life | partial | Unclear | Unclear | Unclear | Moderate | Exclude | Retrospective; no pre‑registered analysis plan |
| 8 | Ranson et al., 2022 [27] | No change in outcome ten years following locking plate repair of displaced proximal humerus fractures | NO | Unclear | Unclear | Unclear | Moderate | Exclude | No registered/public SAP; multiple outcomes/timepoints available (e.g., 1‑year vs long‑term ROM and DASH) with potential for selective emphasis; risk cannot be dismissed |
| 9 | Ockert et al., 2013 [28] | Long-term functional outcomes (median 10 years) after locked plating for displaced fractures of the proximal humerus | NO | Unclear | Unclear | Unclear | Moderate | Exclude | No public protocol or SAP; many possible analytic choices (correlations, regressions, subgroup analyses). Risk of selective reporting cannot be ruled out. |
| 10 | Robinson et al., 2019 [18] | Complications and Long-Term Outcomes of Open Reduction and Plate Fixation of Proximal Humeral Fractures | NO | Unclear | Unclear | Unclear | Moderate | Exclude | No publicly available protocol/SAP; multiple outcomes and subgroup/model choices possible → cannot rule out selective reporting |
| 11 | Zhang et al., 2024 [22] | What Are the Long-term Outcomes of Locking Plates for Nonosteoporotic Three-part and Four-part Proximal Humeral Fractures With a Minimum 10-year Follow-up Period? | NO | Unclear | Unclear | Unclear | Moderate | Exclude | No public protocol/SAP; several analytic choices and subgroupings possible (e.g., anatomical‑reduction strata) → risk can’t be dismissed. |

**RoB 2 Tool for Randomized Controlled Study**

| **Domain** | **Signalling Questions (Summarised)** | **Response** | **Comments / Rationale** |
| --- | --- | --- | --- |
| Domain 1: Randomization process | Was sequence random? | NI | Randomization stated but exact method (computer-generated, block, etc.) not described. |
|  | Was allocation concealed? | NI | Concealment method not reported in the 5‑year follow‑up publication. |
|  | Baseline differences suggesting problems? | PN | No concerning baseline imbalance reported. |
| Judgment |  | Some concerns |  |
| Domain 2: Deviations from intended interventions | Were participants aware of assignment? | Y | Single‑blinded; likely patients were aware at long‑term follow‑up. |
|  | Were carers aware? | Y | Surgeons cannot be blinded to RTSA vs ORIF. |
|  | Deviations due to trial context? | PN | No deviations reported. |
|  | Likely to affect outcomes? | PN | No deviations affecting Constant score described. |
|  | Appropriate ITT analysis? | PY | Results appear analyzed by randomized groups. |
| Judgment |  | Low risk |  |
| Domain 3: Missing outcome data | Outcome data available for nearly all? | N | Only 65/124 had 5‑year Constant scores (~48% follow‑up). |
|  | Evidence result not biased by missing data? | N | No imputation, no sensitivity analysis, no justification. |
|  | Missingness depends on true value? | Y | Highly plausible in elderly fracture patients (complications → loss). |
|  | Likely missingness depended on true value? | PY | Attrition likely related to outcomes. |
| Judgment |  | High risk |  |
| Domain 4: Measurement of the outcome | Measurement method inappropriate? | N | Constant score validated. |
|  | Measurement differed between groups? | PN | Same protocol expected. |
|  | Assessors aware of intervention? | NI | Assessor blinding not stated for 5‑year follow‑up. |
|  | Knowledge influencing measurement? | PN | Objective components reduce risk. |
| Judgment |  | Low risk |  |
| Domain 5: Selection of reported result | Analysis followed prespecified plan? | NI | 5‑year analysis plan not reported. |
|  | Multiple outcome measures available? | PY | Many functional outcomes exist; potential selective emphasis. |
|  | Multiple analyses possible? | PY | Subgroups (C2/B2; age groups) reported; prespecification unclear. |
| Judgment |  | Some concerns |  |
| Overall Risk of Bias |  | HIGH RISK | Driven by high missing data; per RoB 2 rules, one “High” domain → overall High. |

Y = Yes; PY = Probably Yes; N = No; PN = Probably No; NI = No Information; NA = Not Applicable; ITT = Intention‑to‑Treat; RTSA = Reverse Total Shoulder Arthroplasty; ORIF = Open Reduction and Internal Fixation; RCT = Randomized Controlled Trial.

**Supplementary Table S3: GRADE Certainty of Outcomes Assessment**

| **Outcome** | **Effect (as reported)** | **Heterogeneity** | **GRADE Certainty** | **Downgrade Reasons** | **Notes** |
| --- | --- | --- | --- | --- | --- |
| **Functional outcomes** | Constant‑Murley: MD −12.14 (95% CI −30.32 to +6.05; *p*=0.19). DASH/QuickDASH: MD −25.87 (95% CI −70.85 to +19.10; *p*=0.26). OSS: MD +5.00 (95% CI +1.31 to +8.69; *p*=0.008). | Constant: I²=99%; DASH: I²=100%; overall extreme heterogeneity across functional instruments. | Very Low | Risk of Bias, Inconsistency, Imprecision, Publication Bias | Multiple non‑commensurate instruments (Constant, DASH, OSS, etc.) and mixed comparators across studies; funnel plots suggest small‑study effects. |
| **Reoperation rate (any)** | Pooled RR 0.27 (95% CI 0.10–0.70; *p*=0.007). | I²=98% (very high). | Very Low | Risk of Bias, Inconsistency, Indirectness | Pooled endpoint mixes elective hardware removals and unplanned revisions; comparators vary (RTSA, non‑operative). |
| **Complications (composite)** | Pooled RR 0.07 (95% CI 0.04–0.12). | I²=91% (high). | Very Low | Risk of Bias, Inconsistency, Indirectness, Publication Bias | Definitions vary (e.g., AVN, screw penetration, stiffness, osteoarthritis); subgroup signals differ; funnel plot asymmetry suspected. |
