# Supplementary material
Source: Research Square preprint supplement (doi:10.21203/rs.3.rs-9133307/v1)
Supplement: Supplementary file 2 [file f3d8cf449f2771d865d3b7a0.docx]

**("proximal humerus fracture*"[Title/Abstract] OR "humeral head fracture"[Title/Abstract] OR "humeral fractures"[MeSH]) AND ("open reduction internal fixation"[Title/Abstract] OR "surgical fracture repair"[Title/Abstract] OR "ORIF" OR "locking plate"[Title/Abstract] OR "bone plates"[MeSH]) AND ("Follow-Up Studies"[MeSH] OR "long-term"[Title/Abstract] OR "follow up"[Title/Abstract] OR "5-year"[Title/Abstract] OR "≥5 years"[Title/Abstract] OR "midterm"[Title/Abstract] OR "late outcome"[Title/Abstract])** Filters: **Adaptive Clinical Trial, Case Reports, Classical Article, Clinical Study, Clinical Trial, Clinical Trial, Phase I, Clinical Trial, Phase II, Clinical Trial, Phase III, Clinical Trial, Phase IV, Comparative Study, Controlled Clinical Trial, Equivalence Trial, Evaluation Study, Multicenter Study, Observational Study, Pragmatic Clinical Trial, Randomized Controlled Trial, Research Support, N.I.H., Extramural, Research Support, N.I.H., Intramural, Research Support, Non-U.S. Gov't, Research Support, U.S. Gov't, Research Support, U.S. Gov't, Non-P.H.S., Research Support, U.S. Gov't, P.H.S., Twin Study, Validation Study**

(("proximal humerus fracture*"[Title/Abstract] OR "humeral head fracture"[Title/Abstract] OR "humeral fractures"[MeSH Terms]) AND ("open reduction internal fixation"[Title/Abstract] OR "surgical fracture repair"[Title/Abstract] OR "ORIF"[All Fields] OR "locking plate"[Title/Abstract] OR "bone plates"[MeSH Terms]) AND ("Follow-Up Studies"[MeSH Terms] OR "long-term"[Title/Abstract] OR "follow up"[Title/Abstract] OR "5-year"[Title/Abstract] OR "5 years"[Title/Abstract] OR "midterm"[Title/Abstract] OR "late outcome"[Title/Abstract])) AND (adaptiveclinicaltrial[Filter] OR casereports[Filter] OR classicalarticle[Filter] OR clinicalstudy[Filter] OR clinicaltrial[Filter] OR clinicaltrialphasei[Filter] OR clinicaltrialphaseii[Filter] OR clinicaltrialphaseiii[Filter] OR clinicaltrialphaseiv[Filter] OR comparativestudy[Filter] OR controlledclinicaltrial[Filter] OR equivalencetrial[Filter] OR evaluationstudy[Filter] OR multicenterstudy[Filter] OR observationalstudy[Filter] OR pragmaticclinicaltrial[Filter] OR randomizedcontrolledtrial[Filter] OR researchsupportnihextramural[Filter] OR researchsupportnihintramural[Filter] OR researchsupportnonusgovt[Filter] OR researchsupportusgovernment[Filter] OR researchsupportusgovtnonphs[Filter] OR researchsupportusgovtphs[Filter] OR twinstudy[Filter] OR validationstudy[Filter])
